# Supplementary material for: N-Methylbenzoaza-18-crown-6-ether derivatives as efficient alkali metal cations sensors: the dipole moment and first hyperpolarizability
Source: Royal Society of Chemistry journal article supplement (doi:10.1039/c4ra02238f), 2014-01-01
Supplement: c4ra02238f1.pdf [file c4ra02238f1.pdf]

**Supporting Information for**  
**N-methylbenzoaza-18-crown-6-ether Derivatives as Efficient Alkali**  
**Metal Cations Sensors: the Dipole Moment and First**  
**Hyperpolarizability**

*Ying Gao, Shi-Ling Sun, Hong-Liang Xu\*, Liang Zhao and Zhong-Min Su\**

Institute of Functional Material Chemistry, Faculty of Chemistry, Northeast Normal University,

Changchun 130024, Jilin, People's Republic of China

E-mail: [hlxu@nenu.edu.cn](mailto:hlxu@nenu.edu.cn), [zmsu@nenu.edu.cn](mailto:zmsu@nenu.edu.cn)

**Content:**

|                                                                                                                                              |    |
|----------------------------------------------------------------------------------------------------------------------------------------------|----|
| <b>Figure S1</b> Frontier orbital of <b>1-Li<sup>+</sup></b> , <b>1-Na<sup>+</sup></b> and <b>1-K<sup>+</sup></b> with BHandHLYP method..... | S2 |
| Equilibrium geometry of <b>1-Li<sup>+</sup></b> .....                                                                                        | S3 |
| Equilibrium geometry of <b>1-Na<sup>+</sup></b> .....                                                                                        | S6 |
| Equilibrium geometry of <b>1-K<sup>+</sup></b> .....                                                                                         | S9 |

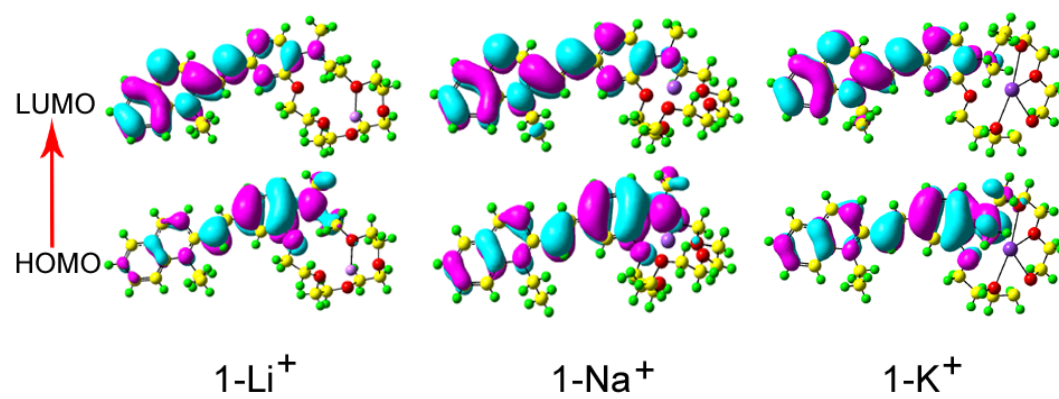

**Figure S1** Frontier orbital of **1-Li<sup>+</sup>**, **1-Na<sup>+</sup>** and **1-K<sup>+</sup>** with BHandHLYP method.

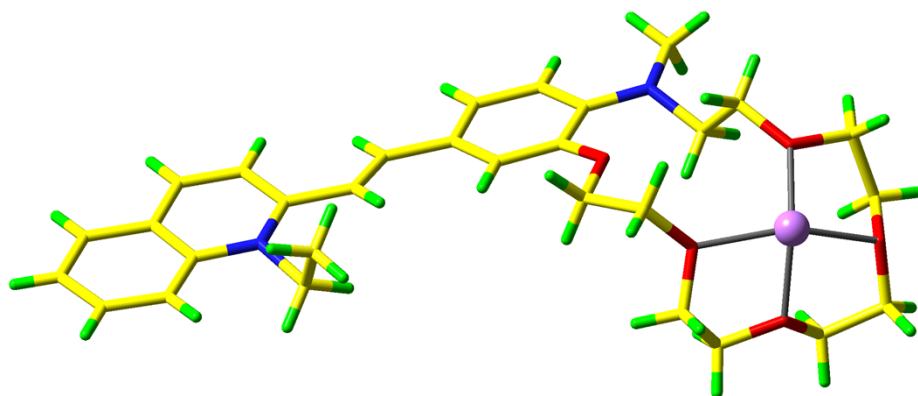

**1-Li<sup>+</sup>**

**Energy = -1658.0653 au**

| Atom | Coordinates |             |             |
|------|-------------|-------------|-------------|
|      | X           | Y           | Z           |
| Li   | 5.70070000  | 6.23840000  | 3.64720000  |
| O    | 4.47360000  | 2.68610000  | 5.61530000  |
| O    | 5.49690000  | 5.38390000  | 5.56970000  |
| O    | 7.55950000  | 6.46630000  | 4.38380000  |
| O    | 6.80990000  | 6.67990000  | 1.87180000  |
| O    | 4.85910000  | 4.87610000  | 2.46300000  |
| N    | 4.82330000  | -0.92750000 | 11.97730000 |
| N    | 4.67700000  | 1.22790000  | 3.30090000  |
| C    | 4.70510000  | -1.55350000 | 10.79980000 |
| C    | 4.59920000  | -2.95870000 | 10.79300000 |
| H    | 4.55000000  | -3.41850000 | 9.96360000  |
| C    | 4.57820000  | -3.66230000 | 11.94520000 |
| H    | 4.50710000  | -4.60950000 | 11.92660000 |
| C    | 4.65930000  | -2.98070000 | 13.16990000 |
| C    | 4.59630000  | -3.70390000 | 14.42170000 |
| H    | 4.52200000  | -4.65180000 | 14.41660000 |
| C    | 4.64680000  | -3.03810000 | 15.60420000 |
| H    | 4.60800000  | -3.51330000 | 16.42690000 |
| C    | 4.75410000  | -1.63480000 | 15.59580000 |
| H    | 4.78880000  | -1.16740000 | 16.42180000 |
| C    | 4.81880000  | -0.92190000 | 14.42000000 |
| H    | 4.87440000  | 0.02530000  | 14.43860000 |
| C    | 4.79960000  | -1.59610000 | 13.21050000 |
| C    | 4.68580000  | -0.78990000 | 9.55820000  |
| H    | 4.58360000  | 0.15190000  | 9.61220000  |
| C    | 4.80410000  | -1.34110000 | 8.35870000  |
| H    | 4.89640000  | -2.28750000 | 8.33510000  |
| C    | 4.81670000  | -0.64720000 | 7.06130000  |

|   |            |             |             |
|---|------------|-------------|-------------|
| C | 4.72690000 | 0.73170000  | 6.97520000  |
| H | 4.70870000 | 1.25330000  | 7.76750000  |
| C | 4.66940000 | 1.35240000  | 5.74370000  |
| C | 4.73170000 | 0.62110000  | 4.55100000  |
| C | 4.81860000 | -0.75110000 | 4.66590000  |
| H | 4.85950000 | -1.27270000 | 3.87360000  |
| C | 4.85740000 | -1.40760000 | 5.90250000  |
| H | 4.90450000 | -2.35460000 | 5.94640000  |
| C | 4.43960000 | 3.51830000  | 6.78940000  |
| H | 5.26950000 | 3.40180000  | 7.31810000  |
| H | 3.66680000 | 3.28080000  | 7.35870000  |
| C | 4.32150000 | 4.95160000  | 6.30450000  |
| H | 3.52500000 | 5.03050000  | 5.72000000  |
| H | 4.18670000 | 5.54810000  | 7.08330000  |
| C | 6.52620000 | 5.86080000  | 6.39740000  |
| H | 6.57980000 | 5.31540000  | 7.22180000  |
| H | 6.35130000 | 6.80070000  | 6.65420000  |
| C | 7.80930000 | 5.76870000  | 5.64230000  |
| H | 8.54580000 | 6.20490000  | 6.14400000  |
| H | 8.05570000 | 4.82450000  | 5.47680000  |
| C | 8.56170000 | 6.25700000  | 3.41750000  |
| H | 8.64920000 | 5.29040000  | 3.22490000  |
| H | 9.43000000 | 6.59190000  | 3.75030000  |
| C | 8.16840000 | 6.98800000  | 2.18770000  |
| H | 8.26720000 | 7.96350000  | 2.33130000  |
| H | 8.75680000 | 6.72300000  | 1.43760000  |
| C | 6.72590000 | 5.48230000  | 1.04400000  |
| H | 7.27940000 | 4.74980000  | 1.42070000  |
| H | 7.02310000 | 5.66550000  | 0.11830000  |
| C | 5.22670000 | 5.13560000  | 1.09640000  |
| H | 4.69370000 | 5.88990000  | 0.74160000  |
| H | 5.04490000 | 4.33690000  | 0.54060000  |
| C | 4.24490000 | 3.58550000  | 2.73840000  |
| H | 3.69460000 | 3.31040000  | 1.96300000  |
| H | 3.64590000 | 3.66740000  | 3.52390000  |
| C | 5.29090000 | 2.53450000  | 3.01210000  |
| H | 5.88530000 | 2.45010000  | 2.22480000  |
| H | 5.84330000 | 2.81430000  | 3.78410000  |
| C | 4.62180000 | 0.36600000  | 2.12010000  |
| H | 4.19570000 | -0.48510000 | 2.35830000  |
| H | 5.52850000 | 0.19820000  | 1.79240000  |
| H | 4.09610000 | 0.80700000  | 1.41900000  |
| C | 5.11660000 | 0.58130000  | 12.01100000 |
| H | 5.71800000 | 0.78740000  | 12.77120000 |

|   |            |            |             |             |  |
|---|------------|------------|-------------|-------------|--|
| H | 5.57630000 | 0.85000000 | 11.17480000 |             |  |
| C | 3.87090000 | 1.32780000 | 12.15130000 |             |  |
| H | 4.06680000 | 2.28840000 | 12.15630000 |             |  |
| H | 3.43490000 | 1.07820000 | 12.99080000 |             |  |
| H |            | 3.28050000 | 1.11930000  | 11.39780000 |  |

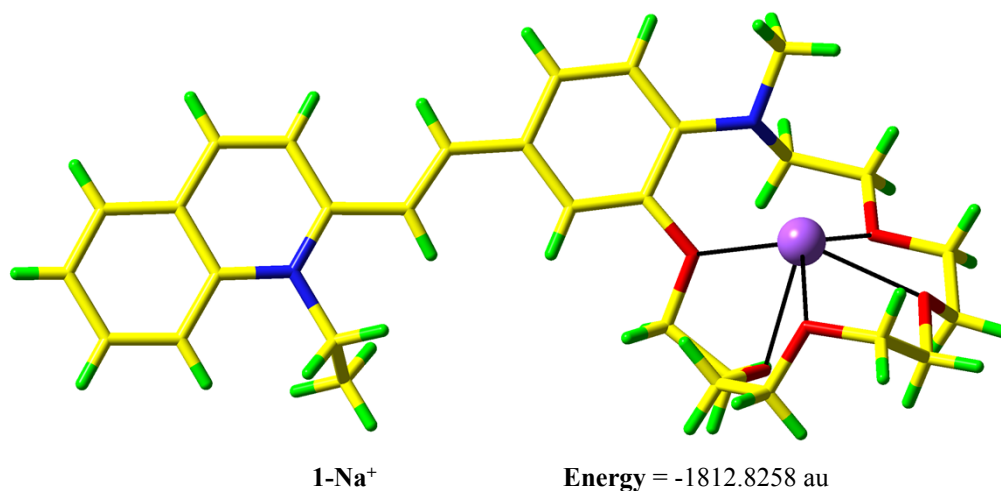

| Atom | Coordinates |             |             |
|------|-------------|-------------|-------------|
|      | X           | Y           | Z           |
| Na   | 0.61950000  | 4.67780000  | 2.86440000  |
| O    | -0.09790000 | 5.00790000  | 5.34190000  |
| O    | 0.92080000  | 2.64580000  | 4.29850000  |
| O    | 2.77140000  | 3.30720000  | 2.37260000  |
| O    | 0.30060000  | 2.97410000  | 1.03310000  |
| O    | -1.71740000 | 4.22260000  | 2.49710000  |
| N    | 3.43310000  | 7.21770000  | 11.53310000 |
| N    | -1.26600000 | 6.91980000  | 3.82450000  |
| C    | 4.10780000  | 7.64890000  | 12.69930000 |
| C    | 4.78470000  | 6.76400000  | 13.54000000 |
| H    | 4.78190000  | 5.83460000  | 13.34210000 |
| C    | 5.45670000  | 7.22140000  | 14.64670000 |
| H    | 5.91930000  | 6.60910000  | 15.20640000 |
| C    | 5.46250000  | 8.60390000  | 14.95530000 |
| H    | 5.94720000  | 8.92050000  | 15.70870000 |
| C    | 4.76930000  | 9.48390000  | 14.17000000 |
| H    | 4.76080000  | 10.40520000 | 14.39980000 |
| C    | 4.06270000  | 9.04730000  | 13.01860000 |
| C    | 3.35380000  | 9.91870000  | 12.17150000 |
| H    | 3.33600000  | 10.84670000 | 12.37370000 |
| C    | 2.69460000  | 9.46890000  | 11.07340000 |
| H    | 2.20910000  | 10.07680000 | 10.52850000 |
| C    | 2.73020000  | 8.07610000  | 10.73710000 |
| C    | 1.98560000  | 7.57220000  | 9.57720000  |
| H    | 1.94850000  | 6.63170000  | 9.44740000  |
| C    | 1.35150000  | 8.35230000  | 8.68760000  |
| H    | 1.36810000  | 9.28560000  | 8.86630000  |

|   |             |            |             |
|---|-------------|------------|-------------|
| C | 0.64750000  | 7.94910000 | 7.48940000  |
| C | 0.07260000  | 8.93590000 | 6.67210000  |
| H | 0.12920000  | 9.84720000 | 6.93390000  |
| C | -0.57290000 | 8.61120000 | 5.49520000  |
| H | -0.95830000 | 9.30480000 | 4.97380000  |
| C | -0.67590000 | 7.28230000 | 5.04820000  |
| C | -0.07250000 | 6.28860000 | 5.87610000  |
| C | 0.56090000  | 6.58550000 | 7.06580000  |
| H | 0.93580000  | 5.89260000 | 7.59790000  |
| C | -1.54540000 | 8.04050000 | 2.91570000  |
| H | -0.75630000 | 8.61780000 | 2.85610000  |
| H | -2.30340000 | 8.55790000 | 3.26050000  |
| H | -1.76390000 | 7.69380000 | 2.02610000  |
| C | 0.12950000  | 3.91720000 | 6.24430000  |
| H | -0.54970000 | 3.91560000 | 6.96580000  |
| H | 1.02770000  | 3.98940000 | 6.65510000  |
| C | 0.02550000  | 2.65080000 | 5.41430000  |
| H | 0.22230000  | 1.86990000 | 5.98890000  |
| H | -0.90310000 | 2.55790000 | 5.08230000  |
| C | 2.30450000  | 2.76140000 | 4.64810000  |
| H | 2.52200000  | 2.15080000 | 5.39730000  |
| H | 2.51370000  | 3.68820000 | 4.92480000  |
| C | 3.09680000  | 2.39180000 | 3.42860000  |
| H | 4.06560000  | 2.43700000 | 3.62870000  |
| H | 2.87900000  | 1.46600000 | 3.15200000  |
| C | 2.65690000  | 2.67370000 | 1.08330000  |
| H | 3.38540000  | 2.01230000 | 0.97900000  |
| H | 2.75730000  | 3.35590000 | 0.37460000  |
| C | 1.32980000  | 1.98020000 | 0.92370000  |
| H | 1.28250000  | 1.53630000 | 0.03830000  |
| H | 1.21650000  | 1.29300000 | 1.62600000  |
| C | -1.00460000 | 2.36360000 | 1.18120000  |
| H | -1.02530000 | 1.79220000 | 1.98990000  |
| H | -1.21020000 | 1.79930000 | 0.39370000  |
| C | -2.01480000 | 3.47760000 | 1.30250000  |
| H | -1.96540000 | 4.07000000 | 0.51080000  |
| H | -2.92970000 | 3.10200000 | 1.35570000  |
| C | -2.73420000 | 5.23090000 | 2.67520000  |
| H | -3.62400000 | 4.80060000 | 2.73480000  |
| H | -2.73830000 | 5.84350000 | 1.89840000  |
| C | -2.46090000 | 6.01240000 | 3.93730000  |
| H | -3.25880000 | 6.55710000 | 4.15860000  |
| H | -2.31420000 | 5.37740000 | 4.68430000  |
| C | 3.55430000  | 5.76710000 | 11.15210000 |

|   |            |            |             |             |  |
|---|------------|------------|-------------|-------------|--|
| H | 4.41820000 | 5.41270000 | 11.47990000 |             |  |
| H | 3.54230000 | 5.68380000 | 10.16670000 |             |  |
| C | 2.41670000 | 4.94950000 | 11.74160000 |             |  |
| H | 2.51880000 | 4.01080000 | 11.47990000 |             |  |
| H | 1.56080000 | 5.29040000 | 11.40750000 |             |  |
| H |            | 2.43540000 | 5.01950000  | 12.71850000 |  |



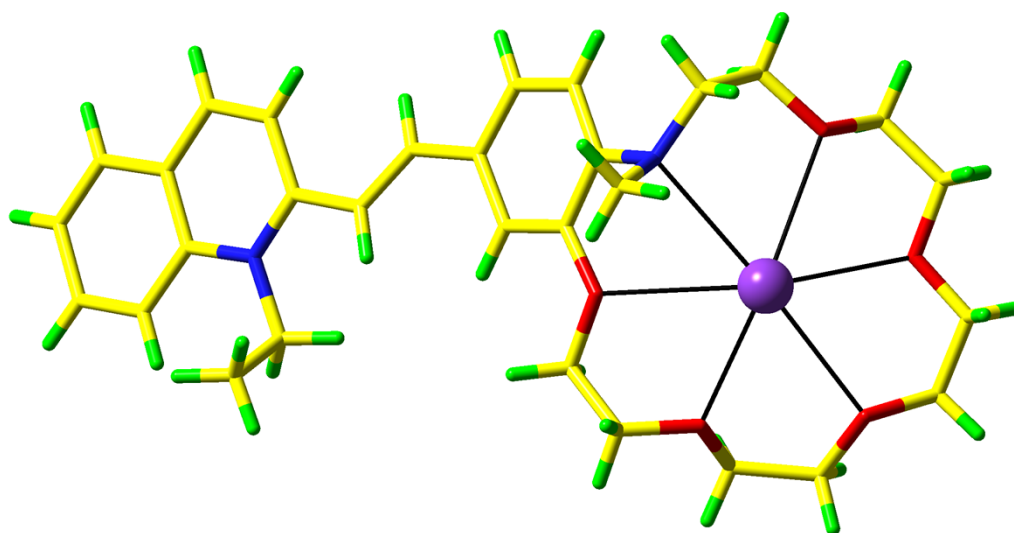

**1-K<sup>+</sup>**

**Energy = -2250.4211 au**

| Atom | Coordinates |             |             |
|------|-------------|-------------|-------------|
|      | X           | Y           | Z           |
| O    | 1.74080000  | 3.39590000  | 16.78330000 |
| N    | -0.80940000 | 0.26310000  | 10.46810000 |
| N    | 3.78510000  | 2.13340000  | 17.99910000 |
| C    | -1.21580000 | -0.33280000 | 9.26430000  |
| C    | -2.14980000 | 0.28840000  | 8.40050000  |
| H    | -2.50710000 | 1.13980000  | 8.62400000  |
| C    | -2.54180000 | -0.33390000 | 7.24110000  |
| H    | -3.15120000 | 0.10450000  | 6.65750000  |
| C    | -2.05310000 | -1.61520000 | 6.90400000  |
| H    | -2.35460000 | -2.04780000 | 6.11350000  |
| C    | -1.14370000 | -2.23220000 | 7.72020000  |
| H    | -0.81180000 | -3.09140000 | 7.48830000  |
| C    | -0.68730000 | -1.59430000 | 8.91790000  |
| C    | 0.29970000  | -2.19370000 | 9.75020000  |
| H    | 0.66360000  | -3.04260000 | 9.52760000  |
| C    | 0.71830000  | -1.53850000 | 10.86910000 |
| H    | 1.40290000  | -1.92480000 | 11.40080000 |
| C    | 0.15970000  | -0.29240000 | 11.26220000 |
| C    | 0.59530000  | 0.38910000  | 12.47470000 |
| H    | 0.36670000  | 1.30330000  | 12.59350000 |
| C    | 1.31450000  | -0.23590000 | 13.43810000 |
| H    | 1.49560000  | -1.15860000 | 13.29910000 |
| C    | 1.84190000  | 0.35210000  | 14.66400000 |
| C    | 2.79170000  | -0.36840000 | 15.39300000 |
| H    | 3.00290000  | -1.25610000 | 15.13130000 |

|   |             |             |             |
|---|-------------|-------------|-------------|
| C | 3.43270000  | 0.18930000  | 16.49280000 |
| H | 4.08360000  | -0.31840000 | 16.96350000 |
| C | 3.13200000  | 1.48890000  | 16.91500000 |
| C | 2.07690000  | 2.17700000  | 16.24970000 |
| C | 1.47040000  | 1.62920000  | 15.12470000 |
| H | 0.80050000  | 2.12050000  | 14.66470000 |
| C | 4.59920000  | 3.30700000  | 17.56900000 |
| H | 5.35380000  | 2.99910000  | 17.02500000 |
| H | 4.93610000  | 3.77740000  | 18.36100000 |
| H | 4.04230000  | 3.91470000  | 17.04090000 |
| K | 1.76320000  | 3.42240000  | 19.67430000 |
| C | 0.65430000  | 4.11250000  | 16.21470000 |
| H | -0.16940000 | 3.56310000  | 16.23290000 |
| H | 0.85420000  | 4.35400000  | 15.27470000 |
| C | 0.47440000  | 5.36430000  | 17.05680000 |
| H | 1.30200000  | 5.90470000  | 16.99540000 |
| H | -0.26060000 | 5.90110000  | 16.66760000 |
| O | 0.18840000  | 5.13620000  | 18.41790000 |
| C | -1.13730000 | 5.03230000  | 18.76160000 |
| H | -1.48970000 | 4.17580000  | 18.41110000 |
| H | -1.63800000 | 5.76410000  | 18.32230000 |
| C | -1.39600000 | 5.09150000  | 20.24790000 |
| H | -2.11200000 | 4.44270000  | 20.46180000 |
| H | -1.74210000 | 5.99450000  | 20.46410000 |
| O | -0.19590000 | 4.80400000  | 21.17200000 |
| C | -0.67770000 | 4.04270000  | 22.30090000 |
| H | -1.45100000 | 3.50160000  | 22.00270000 |
| H | -1.00800000 | 4.67790000  | 22.98600000 |
| C | 0.28540000  | 3.15520000  | 22.92910000 |
| H | 1.01990000  | 3.69630000  | 23.31370000 |
| H | -0.15680000 | 2.67330000  | 23.67110000 |
| O | 0.82530000  | 2.22250000  | 22.03910000 |
| C | 1.63420000  | 1.22990000  | 22.59680000 |
| H | 1.08710000  | 0.67510000  | 23.20900000 |
| H | 2.34600000  | 1.66000000  | 23.13390000 |
| C | 2.25450000  | 0.36100000  | 21.59080000 |
| H | 2.80070000  | -0.33500000 | 22.03460000 |
| H | 1.55350000  | -0.08910000 | 21.05590000 |
| O | 3.08000000  | 1.15280000  | 20.73950000 |
| C | 3.78630000  | 0.39040000  | 19.71980000 |
| H | 4.38220000  | -0.27010000 | 20.15230000 |
| H | 3.13290000  | -0.10260000 | 19.16220000 |
| C | 4.55020000  | 1.25090000  | 18.90040000 |
| H | 5.15910000  | 0.69670000  | 18.35190000 |

|   |             |            |             |
|---|-------------|------------|-------------|
| H | 5.11210000  | 1.81720000 | 19.48770000 |
| C | -1.48130000 | 1.52980000 | 10.88230000 |
| H | -1.43270000 | 1.61720000 | 11.86740000 |
| H | -2.43700000 | 1.49040000 | 10.62700000 |
| C | -0.83600000 | 2.76070000 | 10.23360000 |
| H | -1.30330000 | 3.56950000 | 10.52910000 |
| H | -0.89710000 | 2.68620000 | 9.25900000  |
| H | 0.10670000  | 2.81320000 | 10.49720000 |
